# Supplementary material for: Optimizing the GATA-3 position weight matrix to improve the identification of novel binding sites
Source: PubMed Central journal article supplement (PMC3481455; doi:10.1186/1471-2164-13-416), 2012-08-22
Supplement: 1471-2164-13-416-S1.pdf [file 1471-2164-13-416-S1.pdf]

**Additional Figure 1: z-score distribution of GATA-3 across 10kb upstream.**

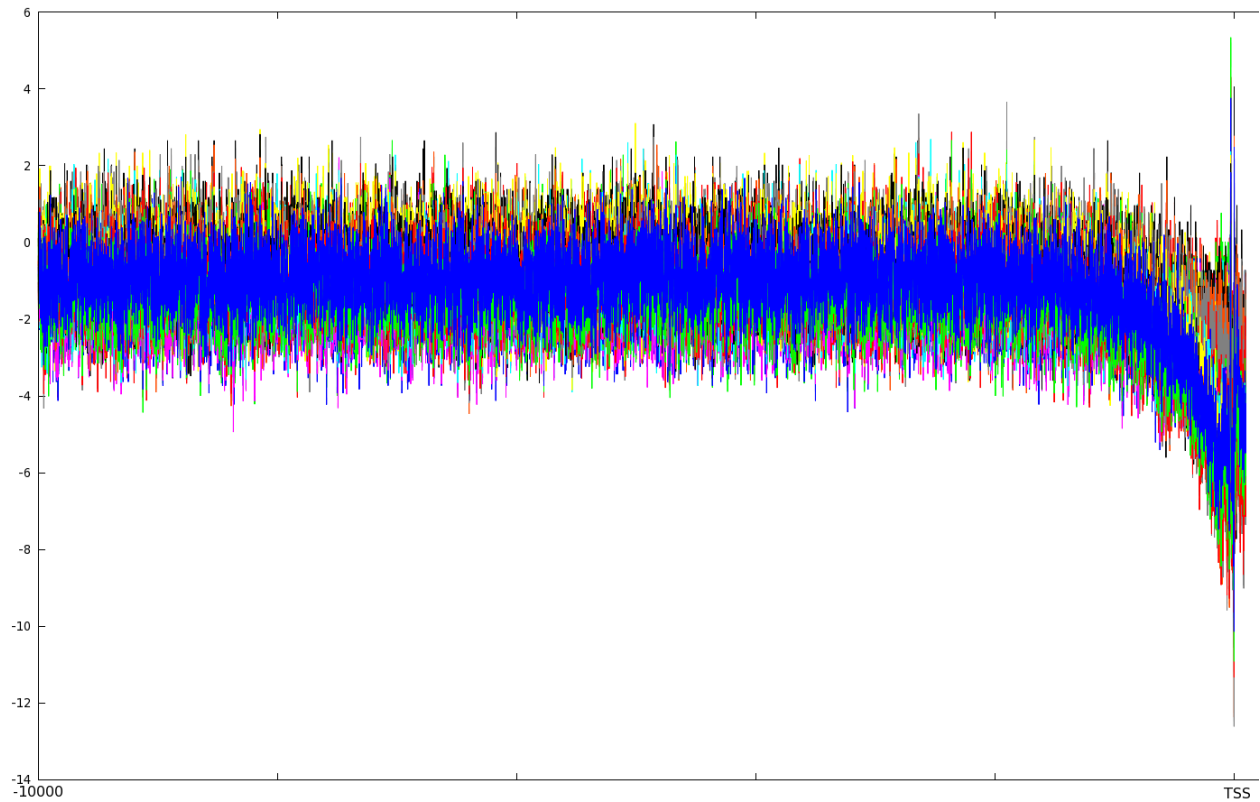

z-score distribution of GATA-3 across 10kb upstream of the EPD promoters. The slope starts around 1kb upstream of the TSS. Different colours represent different threshold starting from stringent to relaxed.

**Additional Figure 2: Comparison of the GATA-3 z-score distribution in promoters divided with respect to the presence of Initiator element.**

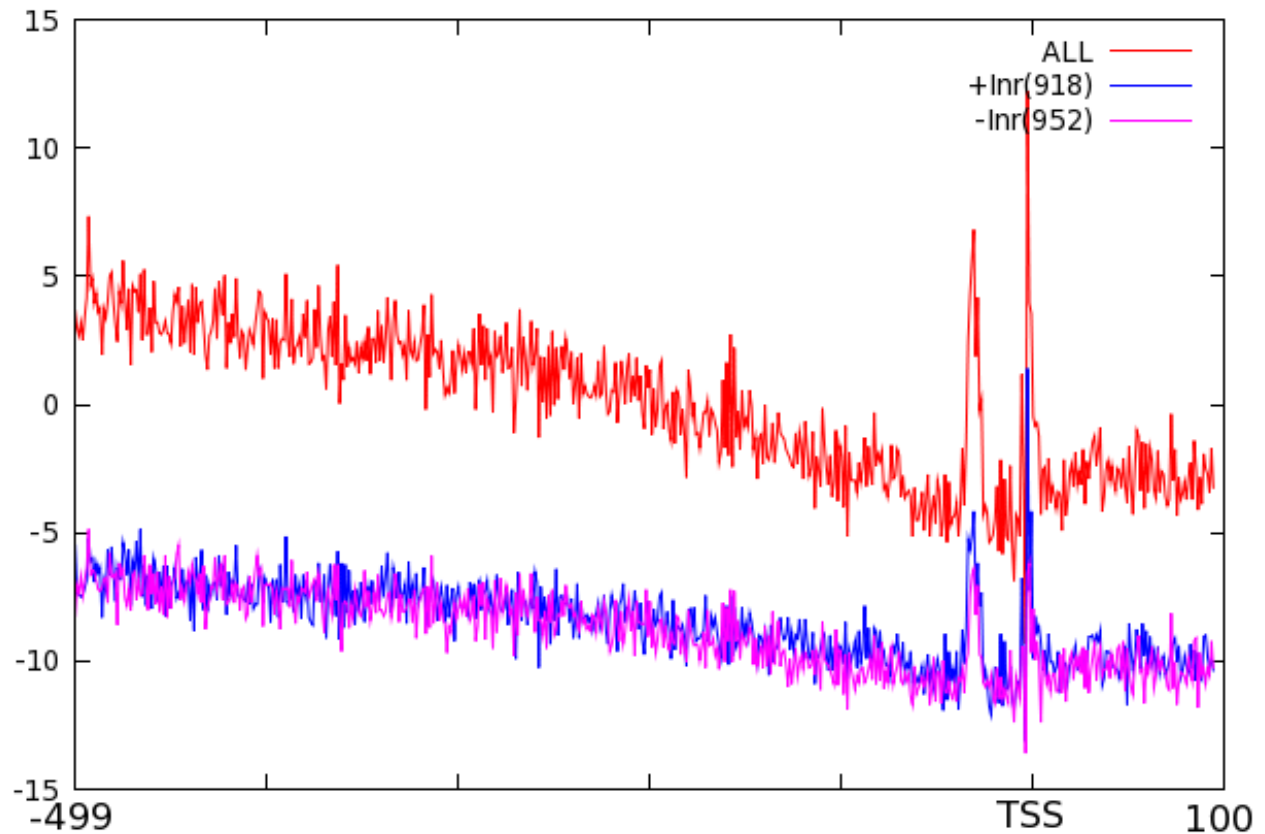

z-score distribution of GATA-3 transcription factor across the divided promoter sequences from EPD depending on presence of Initiator element. The x-axis shows the length of the promoter (-499 to +100). Magenta plot is the distribution of GATA-3 z-scores in the promoters without Initiator element (952), blue plot is the distribution of GATA-3 z-scores in the promoters having Initiator element (918) and the red plot is the distribution in all the 1870 promoters.

**Additional Table 1: The novel putative GATA-3 sites discovered from the EPD with location in the promoter.**

| EPD_id  | Site   | Location | Strand | Score     | Gene_name | Product                                                                      |
|---------|--------|----------|--------|-----------|-----------|------------------------------------------------------------------------------|
| EP37014 | CGATAA | -7       | (+)    | -0.631690 | HS_RPS15  | Ribosomal protein S15 [rat insulinoma gene].                                 |
| EP15034 | GGATAT | -5       | (+)    | -2.709070 | HS_MMP1   | Collagenase, Matrix metalloproteinase-1, MMP1 or CLG gene.                   |
| EP70008 | AGATTA | -6       | (+)    | -1.192390 | HS_ACP2   | Lysosomal acid phosphatase 2.                                                |
| EP40002 | GGATAT | -1       | (-)    | -2.709070 | HS_C5     | Complement, C5 gene.                                                         |
| EP73020 | AGATTG | -1       | (+)    | -1.250360 | HS_TOSO   | Regulator of Fas-induced apoptosis.                                          |
| EP73066 | GGATAT | -1       | (-)    | -2.709070 | HS_MMS19L | MMS19-like (MET18 homolog, <i>S. cerevisiae</i> ).                           |
| EP73436 | TGATAG | -3       | (-)    | -0.142640 | HS_MFAP1  | Microfibrillar-associated protein 1.                                         |
| EP73608 | GGATAT | -5       | (-)    | -2.709070 | HS_AHCY   | S-adenosylhomocysteine hydrolase.                                            |
| EP73694 | AGATTA | -2       | (-)    | -1.192390 | HS_NASP   | Nuclear autoantigenic sperm protein (histone-binding) , transcriptvariant 2. |
| EP73895 | GGATAT | -5       | (+)    | -2.709070 | HS_RNF13  | Ring finger protein 13.                                                      |
| EP73987 | CGATTA | 0        | (+)    | -1.660520 | HS_MLANA  | Melan-A.                                                                     |
| EP74587 | AGATTA | -6       | (+)    | -1.192390 | HS_TTID   | Titin immunoglobulin domain protein (myotilin).                              |

The sites discovered from the EPD with location in the promoter sequences.
